# Supplementary material for: Packed-bed bioreactor synthesis of feruloylated monoacyl- and diacylglycerols: clean production of a “green” sunscreen
Source: Royal Society of Chemistry journal article supplement (doi:10.1039/b302384b), 2003-01-01

Supplemental Figure 1. Bioreactor schematic.

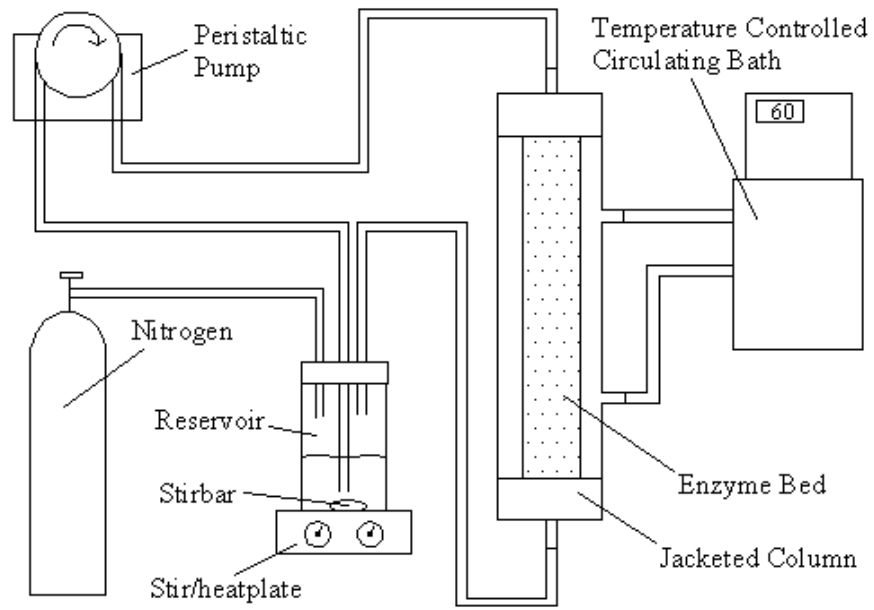

Supplemental Figure 2. HPLC chromatographic analysis of SoyScreen™ after 144 h of reaction with a drying column present. Left panel: isocratic elution profile of ethyl ferulate (EF), feruloyl monoacylglycerols (FMG), and feruloyl diacylglycerols (FDG). Ferulic acid (FA) and feruloyl glycerol (FG) elute ahead of EF. Right panel: gradient elution profile of FA, FG and EF.

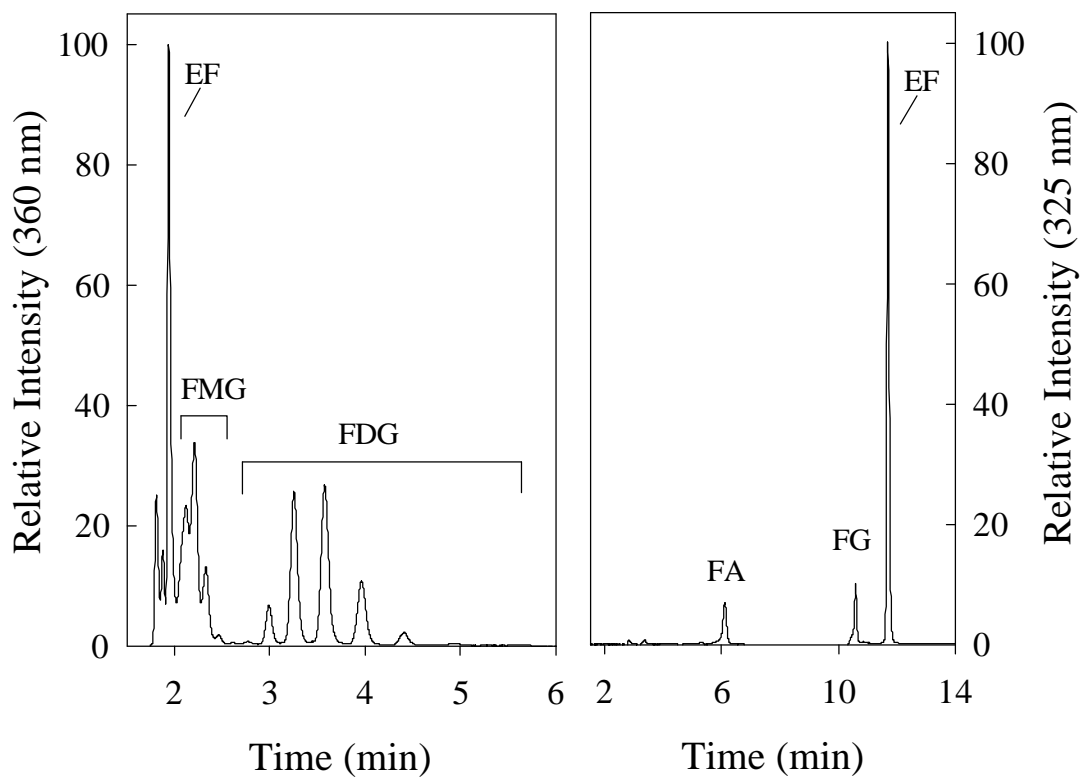

Supplemental Figure 3. Schematic of liquid CO<sub>2</sub> fractionation apparatus. Key: RD, rupture disk; PG, pressure gauge; MMV, micrometering valve; DTM, dry test meter; F, filter; R, rotometer.

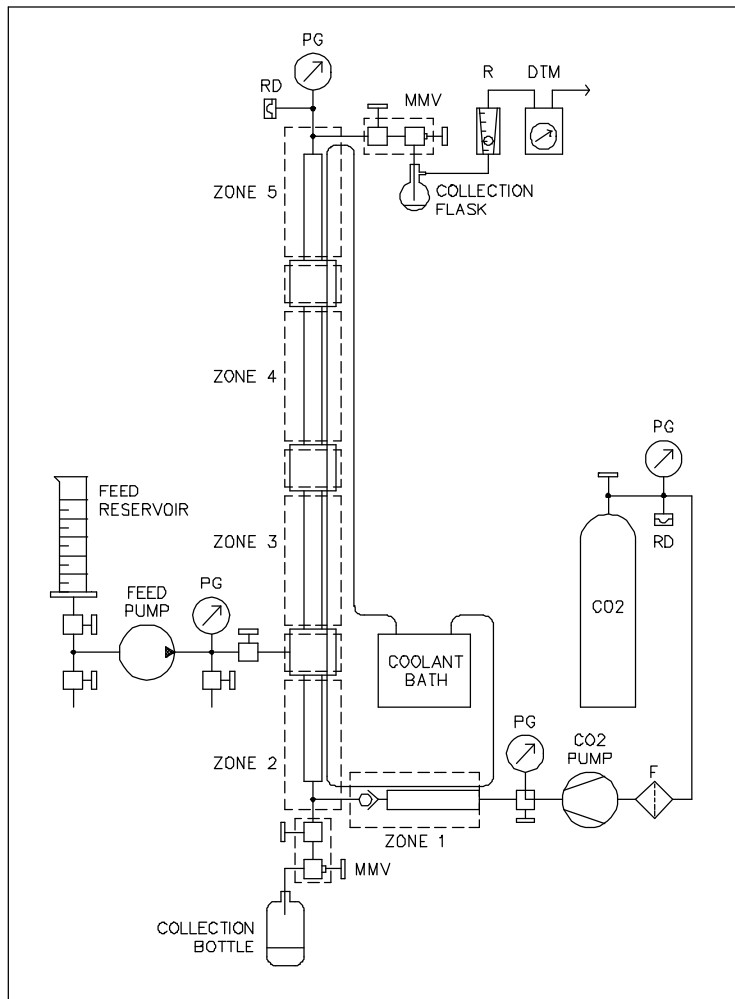

Supplement: b302384b.pdf [file b302384b.pdf]
